# Supplementary figures and images for: Emerging dynamics from high-resolution spatial numerical epidemics
Source: eLife journal article supplement (doi:10.7554/elife.71417), 2021-10-15

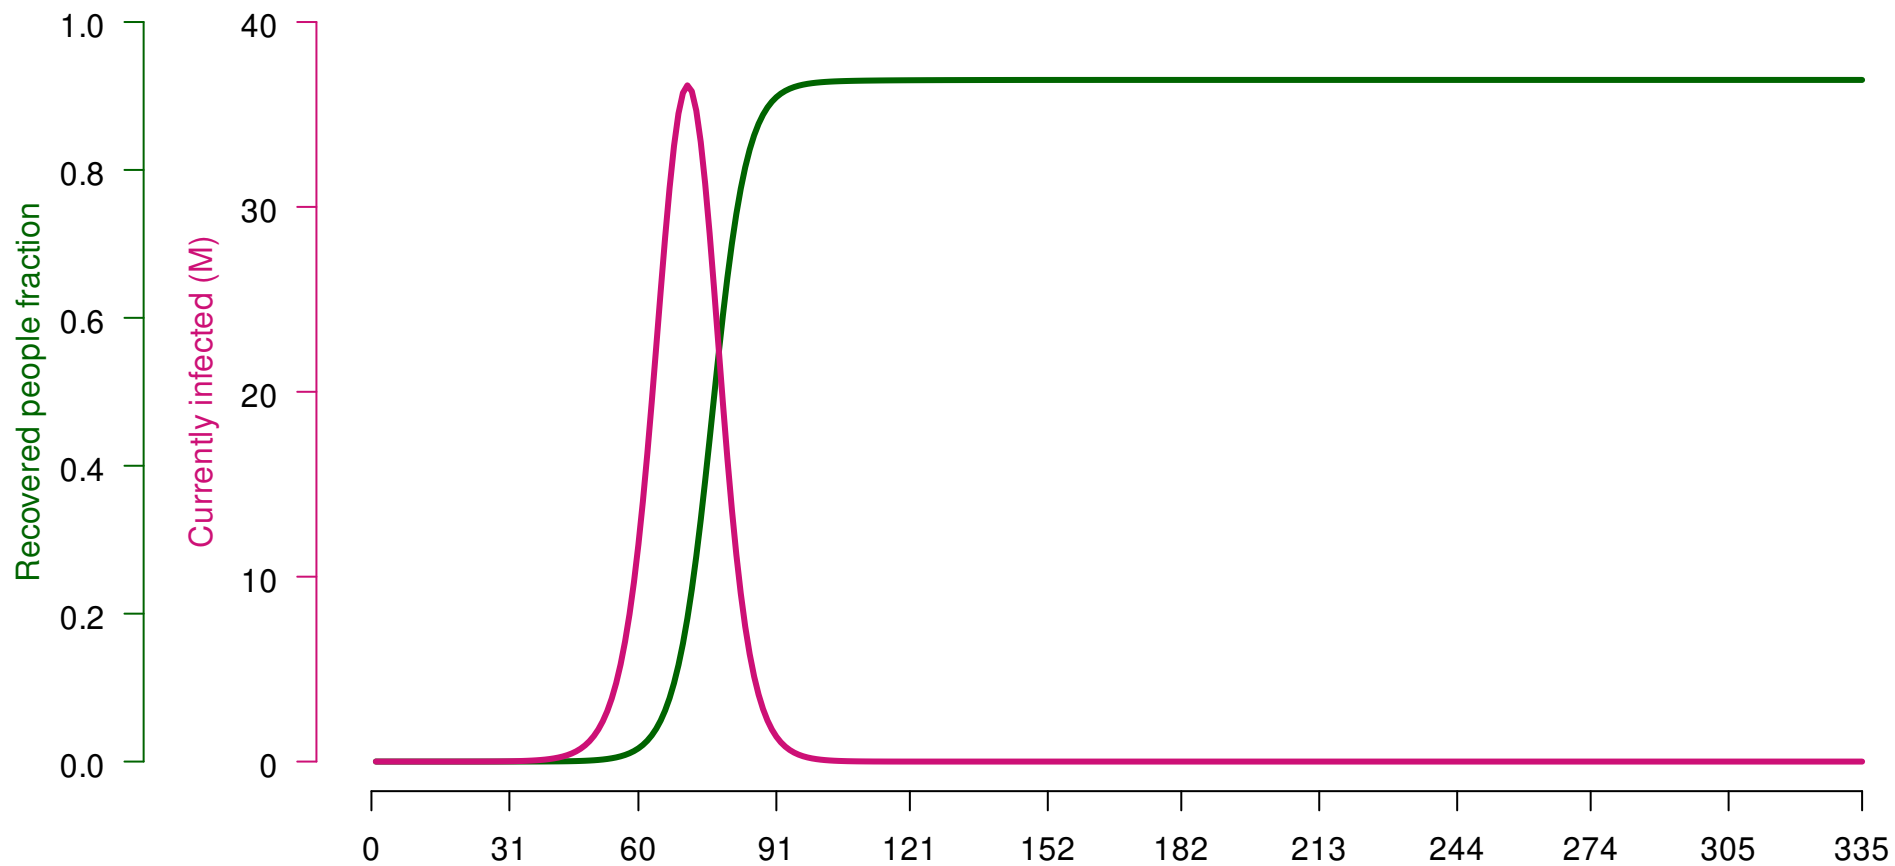

Supplement: supp [file elife_poa_e71417_Figure_2_figure_supplement_1.pdf › elife_poa_e71417_Figure_2_figure_supplement_1.pdf]
